# Supplementary material for: Inkjet-printed Ag electrodes on paper for high sensitivity impedance measurements
Source: Royal Society of Chemistry journal article supplement (doi:10.1039/c6ra18645a), 2016-01-01
Supplement: c6ra18645a1.pdf [file c6ra18645a1.pdf]

## **Electronic Supplementary Information:**

### **Inkjet-printed Ag electrodes on paper for high sensitivity impedance measurements**

Hanbin Ma<sup>a</sup>, Yang Su<sup>a</sup>, Chen Jiang<sup>a</sup> and Arokia Nathan<sup>a\*</sup>

<sup>a</sup>Department of Engineering, Electrical Engineering Division, University of Cambridge

\* To whom correspondence should be addressed:

Tel: +44 (0) 1223 748302

Fax: +44 (0) 1223 748322

E-mail: an299@cam.ac.uk

**ESI Table 1. Concentrations of NaCl solution used for measurements and their electrical properties**

| NaCl solution concentration<br>(mg/ml) | Approx. conductivity<br>(S/m) | Approx. relative permittivity |
|----------------------------------------|-------------------------------|-------------------------------|
| 0.312                                  | 0.0617                        | 80.2                          |
| 0.625                                  | 0.1240                        | 80.1                          |
| 1.25                                   | 0.2480                        | 79.8                          |

**ESI Table 2. Model extracted parameters for the impedance measurements**

|                                           | Electrode          | NaCl concentrations (mg/ml) |          |          |
|-------------------------------------------|--------------------|-----------------------------|----------|----------|
|                                           |                    | 0.312                       | 0.625    | 1.25     |
| Solution resistance<br>$R_s$ ( $\Omega$ ) | Au                 | 4378                        | 2256     | 1150     |
|                                           | Non-passivated Ag  | 3895                        | 2194     | 1208     |
|                                           | Passivated Ag      | 4185                        | 2348     | 1260     |
| Solution capacitance $C_s$ (F)            | Au                 | 8.25e-12                    | 8.11e-12 | 7.69e-12 |
|                                           | Nano-passivated Ag | 1.28e-11                    | 1.25e-11 | 1.17e-11 |
|                                           | Passivated Ag      | 1.35e-11                    | 1.33e-11 | 1.26e-11 |

### **ESI: Office inkjet printer and commercial ink**

In this work, an office inkjet printer (Brother MFC-J6510DW) was used. The circuit printer cartridge set which is compatible with Brother printer was directly purchased from AgIC Inc. The cartridges containing AgIC #1000 inks were designed for short-term use prototyping use. It can be printed on glossy paper directly without the need for a sintering process. The printed sheet thickness is around 135  $\mu\text{m}$  and sheet resistance is 0.3  $\Omega/\text{Sq}$ . (<https://agic.cc/en#index-inks>)

### **ESI: Wetting issue between paper and printed Ag electrode**

The silver ink cartridge used in this work was purchased from industrial supplier (AgIC), which can be printed on glossy paper directly. Wetting issue between paper and conductive ink has been solved by the supplier. In addition, for impedance measurement, only the conductive electrode, electrode-electrolyte interface and the sample solution are involved in the measurement circuit loop. The effects from insulated paper substrate and the interface between paper and electrodes are negligible, and therefore are not mentioned and discussed in the main article.

ESI Figure 1. Model fitting results for gold electrodes with equivalent circuit as shown in Fig. 3.b

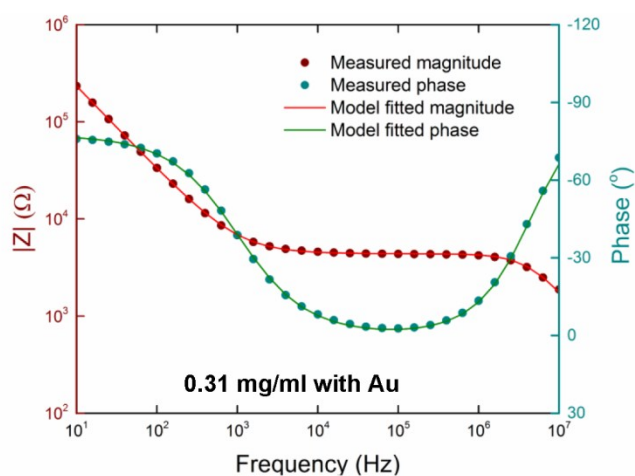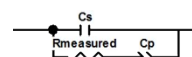

| Element   | Freedom       | Value      | Error      | Error % |
|-----------|---------------|------------|------------|---------|
| Cs        | Free( $\pm$ ) | 8.2497E-12 | 7.1486E-14 | 0.86653 |
| Rmeasured | Free( $\pm$ ) | 4378       | 14.752     | 0.33696 |
| Cp-T      | Free( $\pm$ ) | 1.214E-07  | 1.64E-09   | 1.3509  |
| Cp-P      | Free( $\pm$ ) | 0.86056    | 0.0020223  | 0.235   |

Chi-Squared: 0.00090231  
 Weighted Sum of Squares: 0.052334

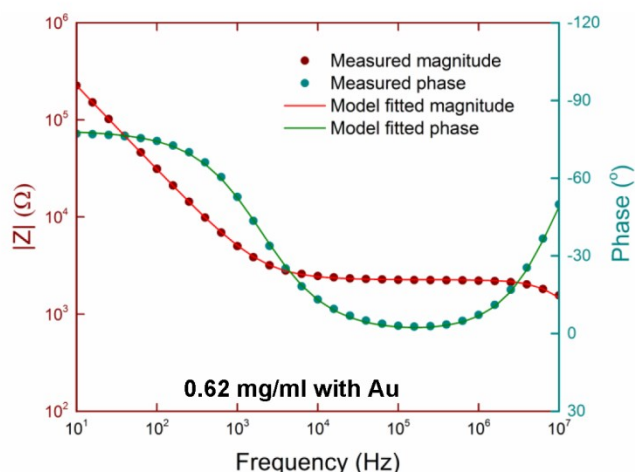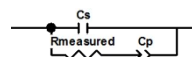

| Element   | Freedom       | Value      | Error      | Error % |
|-----------|---------------|------------|------------|---------|
| Cs        | Free( $\pm$ ) | 8.1073E-12 | 8.765E-14  | 1.0811  |
| Rmeasured | Free( $\pm$ ) | 2256       | 6.7521     | 0.2993  |
| Cp-T      | Free( $\pm$ ) | 1.2034E-07 | 1.3322E-09 | 1.107   |
| Cp-P      | Free( $\pm$ ) | 0.87002    | 0.0015757  | 0.18111 |

Chi-Squared: 0.00074712  
 Weighted Sum of Squares: 0.043333

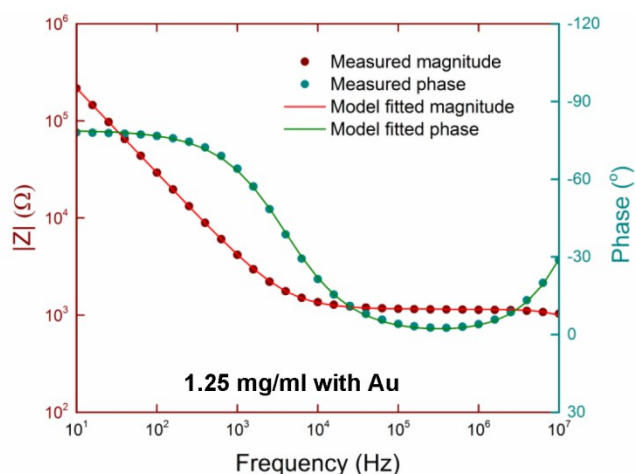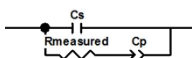

| Element   | Freedom       | Value      | Error      | Error % |
|-----------|---------------|------------|------------|---------|
| Cs        | Free( $\pm$ ) | 7.6947E-12 | 1.1544E-13 | 1.5003  |
| Rmeasured | Free( $\pm$ ) | 1150       | 2.851      | 0.24791 |
| Cp-T      | Free( $\pm$ ) | 1.2133E-07 | 1.0201E-09 | 0.84076 |
| Cp-P      | Free( $\pm$ ) | 0.87714    | 0.001139   | 0.12985 |

Chi-Squared: 0.00053491  
 Weighted Sum of Squares: 0.031025

**ESI Figure 2. Model fitting results for non-passivated Ag electrodes with equivalent circuit as shown in Fig. 3.b**

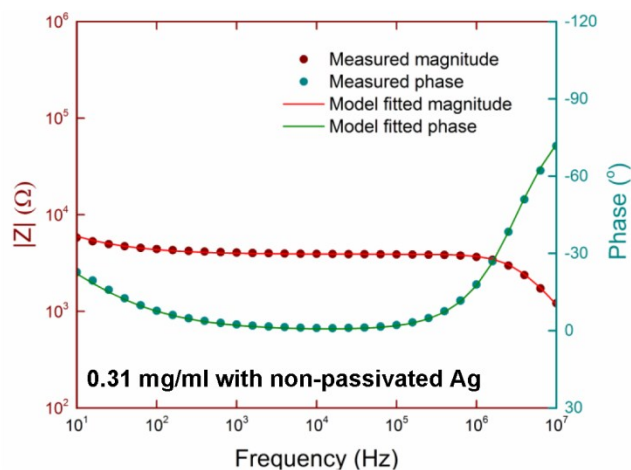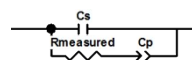

| Element   | Freedom | Value      | Error      | Error % |
|-----------|---------|------------|------------|---------|
| Cs        | Free(±) | 1.2882E-11 | 8.9008E-14 | 0.69095 |
| Rmeasured | Free(±) | 3895       | 11.405     | 0.29281 |
| Cp-T      | Free(±) | 3.0207E-05 | 1.4228E-06 | 4.7102  |
| Cp-P      | Free(±) | 0.5961     | 0.0094817  | 1.5906  |

Chi-Squared: 0.00183  
Weighted Sum of Squares: 0.10614

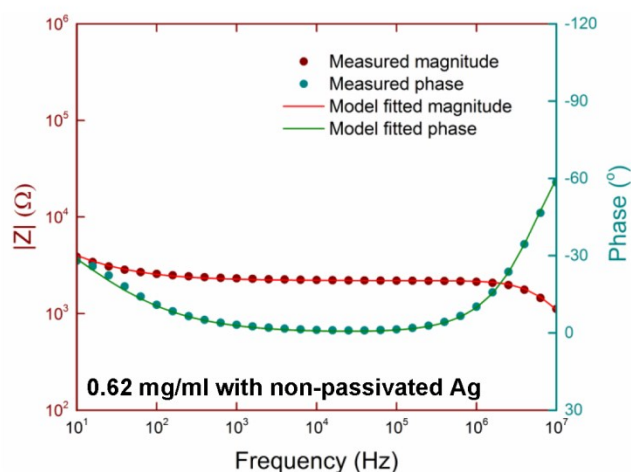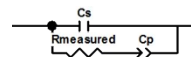

| Element   | Freedom | Value      | Error      | Error % |
|-----------|---------|------------|------------|---------|
| Cs        | Free(±) | 1.2508E-11 | 1.2742E-13 | 1.0187  |
| Rmeasured | Free(±) | 2194       | 7.1582     | 0.32626 |
| Cp-T      | Free(±) | 3.3107E-05 | 1.3983E-06 | 4.2236  |
| Cp-P      | Free(±) | 0.61841    | 0.0083277  | 1.3466  |

Chi-Squared: 0.0024738  
Weighted Sum of Squares: 0.14348

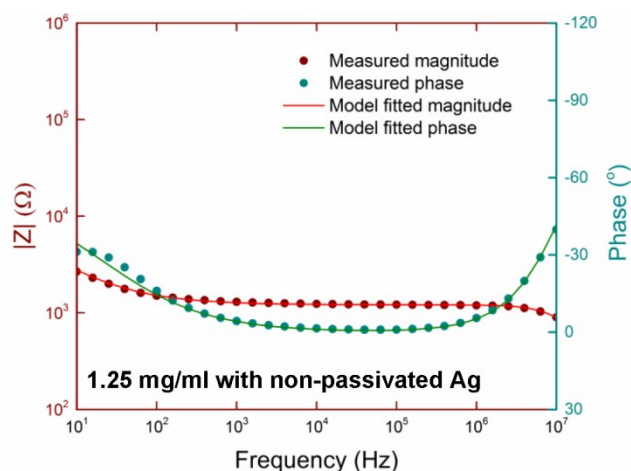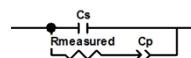

| Element   | Freedom | Value      | Error      | Error % |
|-----------|---------|------------|------------|---------|
| Cs        | Free(±) | 1.1678E-11 | 2.293E-13  | 1.9635  |
| Rmeasured | Free(±) | 1208       | 5.0748     | 0.4201  |
| Cp-T      | Free(±) | 4.0995E-05 | 1.8106E-06 | 4.4166  |
| Cp-P      | Free(±) | 0.61613    | 0.0084383  | 1.3696  |

Chi-Squared: 0.004238  
Weighted Sum of Squares: 0.2458

ESI Figure 3. Model fitting results for passivated Ag electrodes with equivalent circuit as shown in Fig. 3.e

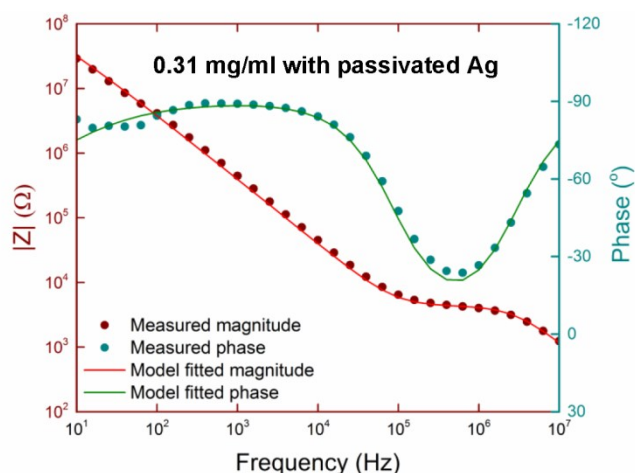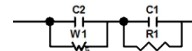

| Element | Freedom  | Value      | Error      | Error % |
|---------|----------|------------|------------|---------|
| C2      | Fixed(X) | 4E-10      | N/A        | N/A     |
| W1-R    | Free(±)  | 3.2033E08  | 1.9515E09  | 609.22  |
| W1-T    | Free(+)  | 0.34828    | 5.3905     | 1547.7  |
| W1-P    | Free(+)  | 0.37336    | 0.0293214  | 24.966  |
| C1      | Free(+)  | 1.3527E-11 | 5.8393E-13 | 4.3168  |
| R1      | Free(+)  | 4185       | 122.87     | 2.936   |

Chi-Squared: 0.039118  
Weighted Sum of Squares: 2.2298

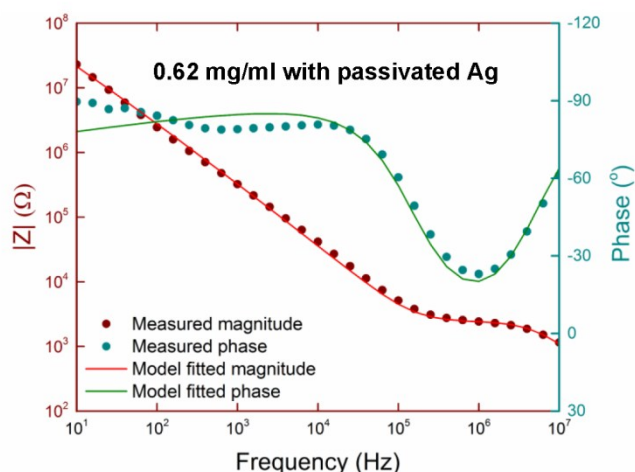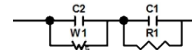

| Element | Freedom  | Value      | Error      | Error % |
|---------|----------|------------|------------|---------|
| C2      | Fixed(X) | 4E-10      | N/A        | N/A     |
| W1-R    | Free(±)  | 3.9701E08  | 5.0804E09  | 1279.7  |
| W1-T    | Free(+)  | 0.33704    | 5.9692     | 1771.1  |
| W1-P    | Free(+)  | 0.71907    | 0.029371   | 4.0846  |
| C1      | Free(+)  | 1.3323E-11 | 8.5434E-13 | 6.4125  |
| R1      | Free(+)  | 2348       | 82.521     | 3.5145  |

Chi-Squared: 0.04198  
Weighted Sum of Squares: 2.3928

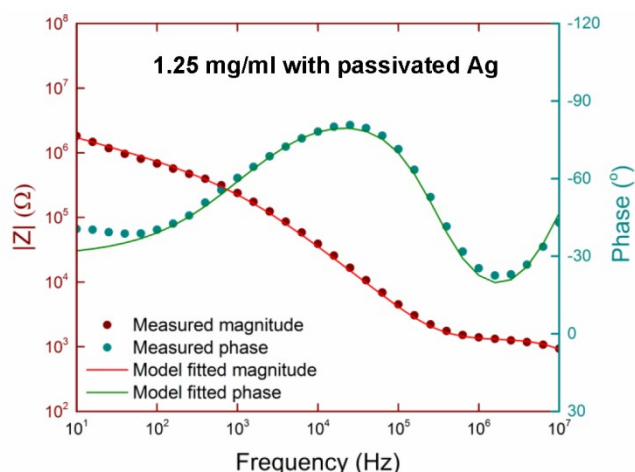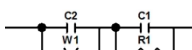

| Element | Freedom  | Value      | Error      | Error %   |
|---------|----------|------------|------------|-----------|
| C2      | Fixed(X) | 4E-10      | N/A        | N/A       |
| W1-R    | Free(±)  | 2.7412E07  | 1.05E13    | 3.8304E07 |
| W1-T    | Free(+)  | 60.98      | 7.0137E07  | 1.1502E08 |
| W1-P    | Free(+)  | 0.33305    | 0.0087123  | 2.6159    |
| C1      | Free(+)  | 1.2563E-11 | 7.8859E-13 | 6.2771    |
| R1      | Free(+)  | 1260       | 30.31      | 2.4056    |

Chi-Squared: 0.010438  
Weighted Sum of Squares: 0.59497
